# Supplementary material
Source: PubMed Central journal article supplement (PMC2920664)
Supplement: mmc1.pdf [file mmc1.pdf]

**BIOPHYSICAL JOURNAL, VOLUME 99**

**Supporting Material**

**A yeast toxic mutant of HET-s(218-289) prion displays alternative intermediates of amyloidogenesis**

## SUPPLEMENTARY INFORMATION

### SUPPLEMENTARY MATERIALS AND METHODS

#### ATR-FTIR spectra analysis

For clarity, the maximum absorbance for the amide I band of all spectra shown have been normalized to the same value. The resulting spectra were analyzed with an algorithm based on a second derivative function (OMNIC software, Thermo Fisher Scientific) and self-deconvolution procedure (GRAMS software, Thermo Fisher Scientific) to determine the number and wavenumber of individual bands within the spectral range 1485-1750  $\text{cm}^{-1}$ . The amide I band of both spectra could be fitted by five components assigned to the vibration of amide I for different secondary structures. The relative contribution of the various bands was obtained by a band-fitting procedure keeping wavenumber, width at half-height and band profile constant. Only intensity was allowed to vary. The fit for both spectra was obtained with a mixed Lorentzian (70%)-Gaussian (30%) band profile and width at half-height included between 18 and 40  $\text{cm}^{-1}$ . Fit parameters have been kept the same for all spectra. The amide II band was fitted by five components (data not shown). Less sensitive to the secondary structure of proteins as amide I in infrared, fit parameters were allowed to freely fluctuate in order to obtain the best fit for this vibration band. Consequently, the relative contributions of the different bands were determined from the fit results obtained for the amide I band. The amount of each secondary structure element is given as a percentage, by dividing the integral intensity of one amide I band component by the total intensity of all amide I band components. For both spectra, fit results correspond to a local minimum at the end of the iteration procedure. The standard error does not exceed 1.5%. Assignment of amide I and I' (in  $\text{D}_2\text{O}$ ) were made according to Goormaghtigh *et al.*, 1994a/b.

## SUPPLEMENTARY RESULTS

**SUPPLEMENTARY TABLE 1** Vibrational assignments of the ATR-FTIR band components in the amide I region for WT and M8 air-dried amyloids

| Band   | Secondary structure elements* | Wavenumber (cm <sup>-1</sup> ) |          | Width (cm <sup>-1</sup> ) | Profile        |
|--------|-------------------------------|--------------------------------|----------|---------------------------|----------------|
|        |                               | Wild-type                      | Mutant 8 |                           |                |
| Band 1 | Antiparallel $\beta$ -sheet   | 1692.3                         | 1692.3   | 18.3                      | 70% Lorentzian |
| Band 2 | $\beta$ -turn                 | 1669.4                         | 1672.0   | 36.7                      | 70% Lorentzian |
| Band 3 | Random coil                   | 1655.0                         | 1651.0   | 39.9                      | 70% Lorentzian |
| Band 4 | Parallel $\beta$ -sheet       | 1630.0                         | 1630.0   | 29.6                      | 70% Lorentzian |
| Band 5 | Antiparallel $\beta$ -sheet   | 1619.5                         | 1619.8   | 26.1                      | 70% Lorentzian |

\* Assignments were made according to Goormaghtigh *et al.*, 1994a.

**SUPPLEMENTARY TABLE 2** Physico-chemical parameters of His-tagged WT and M8 proteins

| Proteins | MW     | pI   | Net charge | Hydropathicity |
|----------|--------|------|------------|----------------|
| WT       | 9548.7 | 8.15 | +1         | -0.442         |
| M8       | 9347.4 | 8.22 | +1         | -0.474         |

Molecular weight, isoelectric point, net charge at pH 7.4, and grand average of hydropathicity (GRAVY) were estimated from the amino-acid sequence of each protein fused to the His tag (data from ExPASy Proteomics Server, <http://expasy.org/tools/protparam.html>)

**A**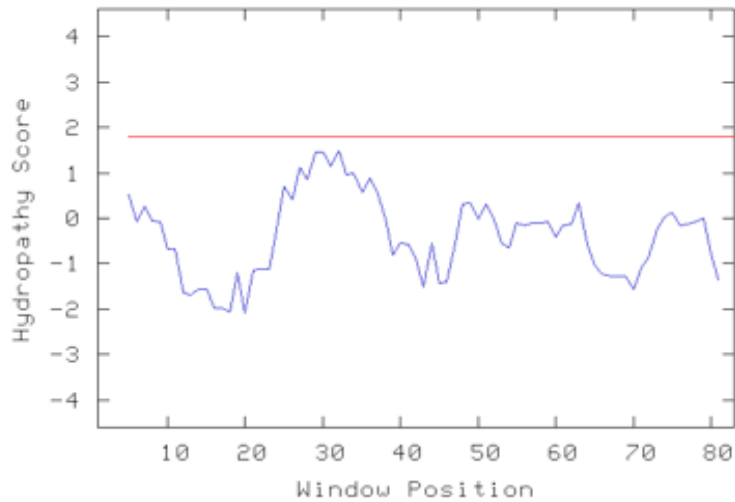**B**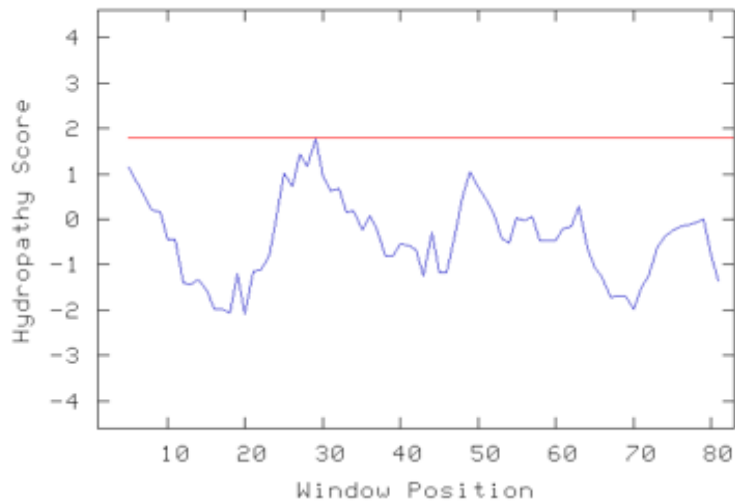

FIGURE S1 Kyte-Doolittle hydropathy plots of WT (A) and M8 (B) obtained at <http://gcat.davidson.edu/rakarnik/kyte-doolittle.htm> (Kyte & Doolittle, 1982). Window size 9 was applied.

#### SUPPLEMENTARY REFERENCES

- Goormaghtigh, E., Cabiliaux, V., and J. M. Ruyschaert. 1994. Determination of soluble and membrane protein structure by Fourier transform infrared spectroscopy. I. Assignments and model compounds. *Subcell. Biochem.* 23:329-362.
- Goormaghtigh, E., Cabiliaux, V., and J. M. Ruyschaert. 1994. Determination of soluble and membrane protein structure by Fourier transform infrared spectroscopy. II. Experimental Aspects, Side chain Structure, and H/D Exchange. *Subcell. Biochem.* 23:363-403.
- Kyte, J., and Doolittle, R.F. 1982. A simple method for displaying the hydropathic character of a protein. *J. Mol. Biol.* 157:105-132.
